# Supplementary material for: A dinuclear dysprosium Schiff base complex showing slow magnetic relaxation in the absence of an external magnetic field
Source: Royal Society of Chemistry journal article supplement (doi:10.1039/d2nj02591d), 2022-01-01
Supplement: d2nj02591d1.pdf [file d2nj02591d1.pdf]

New Journal of Chemistry

Supplementary Information

**Dinuclear dysprosium Schiff base complex showing slow magnetic relaxation in the  
absence of an external magnetic field**

**Mamo Gebrezgiabher<sup>a,b</sup>, Sören Schlittenhardt<sup>c</sup>, Cyril Rajnák<sup>b</sup>, Juraj Kuchár<sup>d</sup>, Assefa  
Sergawie<sup>a</sup>, Juraj Černák<sup>d</sup>, Mario Ruben<sup>c,e,f,\*</sup>, Madhu Thomas<sup>a,\*</sup> and Roman Boča<sup>b</sup>**

<sup>a</sup>Department of Industrial Chemistry, College of Applied Sciences, Nanotechnology Excellence Center, Addis Ababa Science and Technology University, Addis Ababa P.O. Box 16417, Ethiopia.

<sup>b</sup>Department of Chemistry, Faculty of Natural Sciences, University of SS Cyril and Methodius 91701 Trnava, Slovakia.

<sup>c</sup>Institute of Nanotechnology, Karlsruhe Institute of Technology, Hermann-von-Helmholtz-Platz 1, 76344 Eggenstein-Leopoldshafen, Germany.

<sup>d</sup>Department of Inorganic Chemistry, Institute of Chemistry, P. J. Šafárik University in Košice, Moyzesova 11, 041 54 Košice, Slovakia.

<sup>e</sup>Institute of Quantum Materials and Technologies (IQMT), Karlsruhe Institute of Technology, Hermann-von-Helmholtz-Platz 1, 76344 Eggenstein-Leopoldshafen, Germany.

<sup>f</sup>Centre Européen de Science Quantique (CESQ); Institut de Science et d'Ingénierie Supramoléculaires (ISIS, UMR 7006), CNRS-Université de Strasbourg, 8 allée Gaspard Monge BP 70028 67083 Strasbourg Cedex, France.

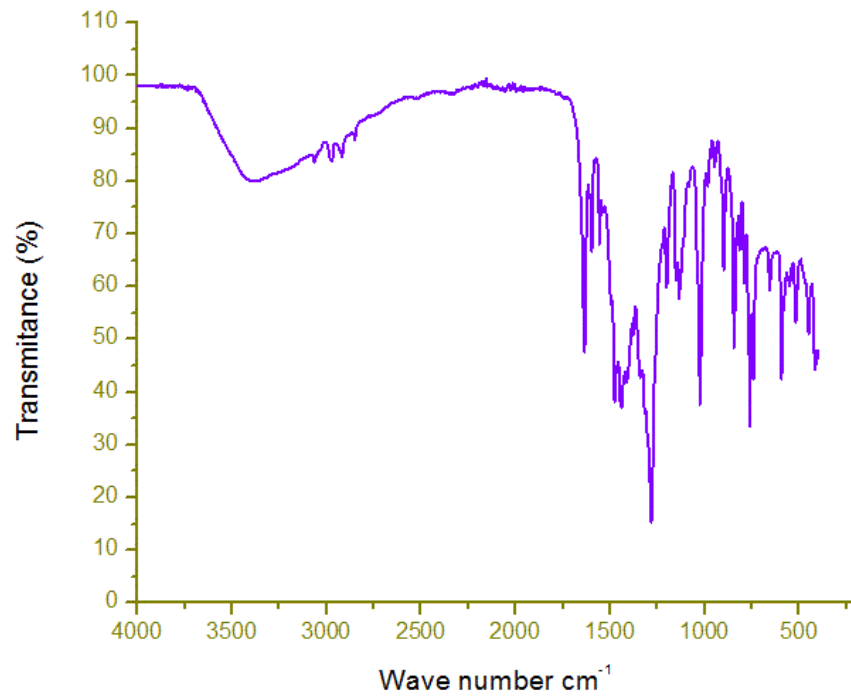

**Fig. S1** IR spectrum of complex **1**.

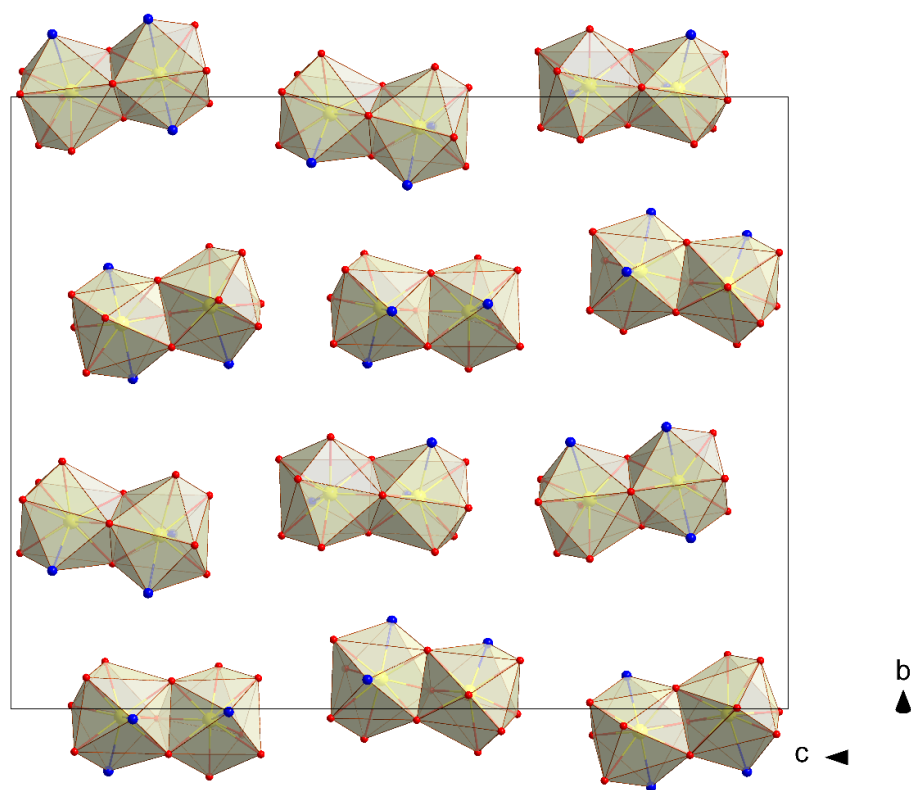

**Fig. S2** View of the packing of the structure of **1** along  $a$  axis. Only the shared polyhedra around the Dy(III) central atoms are shown for clarity.

**Table S1** Crystal data and structure refinement for complex **1**.

|                   |                                                   |
|-------------------|---------------------------------------------------|
| Empirical formula | $C_{30}H_{36} Dy_2N_6O_{15} \cdot (CH_3OH)_{1.2}$ |
| Formula weight    | 1082.86                                           |
| Temperature/K     | 299.15                                            |
| Crystal system    | trigonal                                          |
| Space group       | R-3                                               |
| $a/\text{\AA}$    | 27.0452(8)                                        |
| $b/\text{\AA}$    | 27.0452(8)                                        |
| $c/\text{\AA}$    | 29.7710(7)                                        |
| $\alpha/^\circ$   | 90                                                |
| $\beta/^\circ$    | 90                                                |

|                                               |                                                               |
|-----------------------------------------------|---------------------------------------------------------------|
| $\gamma/^\circ$                               | 120                                                           |
| Volume/ $\text{\AA}^3$                        | 18858.4(12)                                                   |
| Z                                             | 18                                                            |
| $\rho_{\text{calc}} \text{ g/cm}^3$           | 1.716                                                         |
| $\mu/\text{mm}^{-1}$                          | 3.611                                                         |
| F(000)                                        | 9546.0                                                        |
| Crystal size/ $\text{mm}^3$                   | $0.356 \times 0.196 \times 0.171$                             |
| Radiation                                     | MoK $\alpha$ ( $\lambda = 0.71073$ )                          |
| $2\theta$ range for data collection/ $^\circ$ | 4.8 to 51.99                                                  |
| Index ranges                                  | $-32 \leq h \leq 12, -24 \leq k \leq 33, -29 \leq l \leq 36$  |
| Reflections collected                         | 15170                                                         |
| Independent reflections                       | 8246 [ $R_{\text{int}} = 0.0237, R_{\text{sigma}} = 0.0390$ ] |
| Data/restraints/parameters                    | 8246/4/530                                                    |
| Goodness-of-fit on $F^2$                      | 1.025                                                         |
| Final R indexes [ $I \geq 2\sigma(I)$ ]       | $R_1 = 0.0276, wR_2 = 0.0618$                                 |
| Final R indexes [all data]                    | $R_1 = 0.0372, wR_2 = 0.0662$                                 |
| Largest diff. peak/hole / $e \text{\AA}^{-3}$ | 0.70/-0.47                                                    |

**Table S2** Selected bond distances and bond angles in angstrom ( $\text{\AA}$ ) and degree ( $^\circ$ ), respectively.

|           |                       |
|-----------|-----------------------|
| O21...Dy2 | 2.334(3) $\text{\AA}$ |
| O32...Dy2 | 2.436(3) $\text{\AA}$ |
| O5...Dy2  | 2.447(3) $\text{\AA}$ |
| O4...Dy2  | 2.553(4) $\text{\AA}$ |
| O8...Dy2  | 2.456(3) $\text{\AA}$ |
| O7...Dy2  | 2.570(3) $\text{\AA}$ |
| O11...Dy2 | 2.330(3) $\text{\AA}$ |
| O31...Dy2 | 2.293(2) $\text{\AA}$ |
| N31...Dy2 | 2.480(5) $\text{\AA}$ |
| O11...Dy1 | 2.333(3) $\text{\AA}$ |
| O12...Dy1 | 2.404(3) $\text{\AA}$ |
| O22...Dy1 | 2.436(4) $\text{\AA}$ |
| O21...Dy1 | 2.329(3) $\text{\AA}$ |
| O2...Dy1  | 2.477(4) $\text{\AA}$ |
| N21...Dy1 | 2.488(3) $\text{\AA}$ |

|                 |             |
|-----------------|-------------|
| O1...Dy1        | 2.634(4) Å  |
| N11...Dy1       | 2.537(5) Å  |
| O31...Dy1       | 2.366(2) Å  |
| Dy2...Dy1       | 3.4552(8) Å |
| O11...O21       | 2.697(5) Å  |
| O21...O31       | 2.625(3) Å  |
| O11...O31       | 2.799(4) Å  |
| Dy1---O31---Dy2 | 95.74(1)°   |
| Dy1---O21---Dy2 | 95.63(1)°   |
| Dy1---O11---Dy2 | 95.64(1)°   |

**Table S3** Results of the Continuous Shape Measures calculations using the Program *SHAPE*<sup>54</sup>

| S H A P E v2.1  |                    |                                    |         |         |         |        |          |        |
|-----------------|--------------------|------------------------------------|---------|---------|---------|--------|----------|--------|
| EP-9            | 1 D <sub>9h</sub>  | Enneagon                           |         |         |         |        |          |        |
| OPY-9           | 2 C <sub>8v</sub>  | Octagonal pyramid                  |         |         |         |        |          |        |
| HBPY-9          | 3 D <sub>7h</sub>  | Heptagonal bipyramid               |         |         |         |        |          |        |
| JTC-9           | 4 C <sub>3v</sub>  | Johnson triangular cupola J3       |         |         |         |        |          |        |
| JCCU-9          | 5 C <sub>4v</sub>  | Capped cube J8                     |         |         |         |        |          |        |
| CCU-9           | 6 C <sub>4v</sub>  | Spherical-relaxed capped cube      |         |         |         |        |          |        |
| JCSAPR-9        | 7 C <sub>4v</sub>  | Capped square antiprism J10        |         |         |         |        |          |        |
| CSAPR-9         | 8 C <sub>4v</sub>  | Spherical capped square antiprism  |         |         |         |        |          |        |
| JTCTPR-9        | 9 D <sub>3h</sub>  | Tricapped trigonal prism J51       |         |         |         |        |          |        |
| TCTPR-9         | 10 D <sub>3h</sub> | Spherical tricapped trigonal prism |         |         |         |        |          |        |
| JTDIC-9         | 11 C <sub>3v</sub> | Tridiminished icosahedron J63      |         |         |         |        |          |        |
| HH-9            | 12 C <sub>2v</sub> | Hula-hoop                          |         |         |         |        |          |        |
| MFF-9           | 13 C <sub>s</sub>  | Muffin                             |         |         |         |        |          |        |
| Structure [ML9] | EP-9               | OPY-9                              | HBPY-9  | JTC-9   | JCCU-9  | CCU-9  | JCSAPR-9 |        |
| CSAPR-9         | JTCTPR-9           | TCTPR-9                            | JTDIC-9 | HH-9    | MFF-9   |        |          |        |
| <b>Dy1</b>      | 36.890,            | 20.900,                            | 19.377, | 14.692, | 10.430, | 9.157, | 2.307,   | 1.760, |
|                 | 2.610,             | 1.206,                             | 11.087, | 10.850, | 1.640   |        |          |        |
| <b>Dy2</b>      | 36.192,            | 21.362,                            | 19.416, | 14.324, | 10.569, | 9.227, | 3.045,   | 2.293, |
|                 | 3.102,             | 1.520,                             | 10.542, | 12.052, | 2.580   |        |          |        |

**Table S4** Possible hydrogen bonds in **1** [Å, °]

| D-H...A                     | d(D-H) | d(D...A)  | d(H...A) | D-H...A |
|-----------------------------|--------|-----------|----------|---------|
| O41-H41...O8                | 0.82   | 2.7662(1) | 2.02     | 150     |
| O22-                        | 0.81   | 2.8751(1) | 2.06     | 178     |
| H221...O6 <sup>i</sup>      |        |           |          |         |
| O12-                        | 0.82   | 2.7526(1) | 1.94     | 176     |
| H121...O41 <sup>i</sup>     |        |           |          |         |
| O32-H321...O3 <sup>ii</sup> | 0.81   | 2.9614(1) | 2.17     | 165     |

Symmetry codes: i: 1/3-x+y, 2/3-x, -1/3+z; ii: 2/3-y, 1/3+x-y, 1/3+z;

**Table S5** Additional non-covalent contacts in **1** [ $\text{\AA}$ ,  $^\circ$ ]

| D–H $\cdots$ A                          | d(D–H) | d(D $\cdots$ A) | d(H $\cdots$ A) | D–H $\cdots$ A |
|-----------------------------------------|--------|-----------------|-----------------|----------------|
| C19–<br>H19A $\cdots$ O41 <sup>i</sup>  | 0.96   | 3.279(8)        | 2.69            | 120            |
| C35–<br>H35 $\cdots$ O41 <sup>iii</sup> | 0.93   | 3.574(8)        | 2.69            | 160            |
| C28–H28 $\cdots$ O5 <sup>i</sup>        | 0.98   | 3.209(6)        | 2.46            | 133            |
| C36–H36 $\cdots$ O3 <sup>iv</sup>       | 1.01   | 3.400(8)        | 2.65            | 131            |
| C27–H27 $\cdots$ O9 <sup>v</sup>        | 0.81   | 3.507(7)        | 2.63            | 150            |
| C36–H36 $\cdots$ O9 <sup>vi</sup>       | 1.01   | 3.403(5)        | 2.70            | 127            |
| C37–<br>H37B $\cdots$ O9 <sup>vi</sup>  | 0.97   | 3.450(6)        | 2.63            | 142            |

Symmetry codes: i: 1/3-x+y, 2/3-x, -1/3+z; ii: 2/3-y, 1/3+x-y, 1/3+z; iii: -1/3+y, 1/3-x+y, 1/3+z;  
iv: x-y, x, 1-z; v: 1-x, 1-y, 1-z; vi: -1/3+y, 1/3-x+y, 4/3-z.

**Table S6** Fitted AC susceptibility data at  $T = 2.0$  K <sup>a</sup>

| $B/T$ | $\chi_s$ | $\chi_{T(LF)}$ | $\alpha_{LF}$ | $\tau_{LF}/\text{ms}$ | $\chi_{T(HF)}$ | $\alpha_{HF}$ | $\tau_{HF}/\mu\text{s}$ |
|-------|----------|----------------|---------------|-----------------------|----------------|---------------|-------------------------|
| 0.0   | 60.0     | 60.7           | 0.22          | <b>0.33</b>           | 69             | 0.01          | 5.4                     |
| 0.1   | 10.1     | 11.3           | 0.50(12)      | <b>20.9(83)</b>       | 68.6(1)        | 0.25(4)       | 2.1                     |
| 0.2   | 10.0     | 13.4           | 0.50(5)       | <b>49.8(77)</b>       | 67.2(2)        | 0.23(7)       | 1.7                     |
| 0.3   | 50.2     | 56.6           | 0.46(3)       | <b>48.2(39)</b>       | 65.2(2)        | 0.30(28)      | 3.3                     |
| 0.4   | 40.4     | 50.3           | 0.42(2)       | <b>51.0(27)</b>       | 61.8(2)        | 0.60(50)      | 0.10                    |
| 0.5   | 28.8     | 42.0           | 0.40(1)       | <b>56.5(20)</b>       | 56.5(2)        | 0.60(37)      | 0.31                    |

<sup>a</sup>AC susceptibility components in unit of  $10^{-6} \text{ m}^3 \text{ mol}^{-1}$  [SI]. Standard deviation is not displayed when its value is greater than the value of the optimized parameter. Note: 20.9(83) means  $20.9 \pm 8.3$ .

The Debye equation for AC susceptibility can be extended to the *two-set Debye model*

$$\chi(\omega) = \chi_s + \frac{\chi_{T1} - \chi_s}{1 + (i\omega\tau_1)^{1-\alpha_1}} + \frac{\chi_{T2} - \chi_{T1}}{1 + (i\omega\tau_2)^{1-\alpha_2}}$$

which splits into the in-phase component

$$\chi'(\omega) = \chi_S + (\chi_{T1} - \chi_S) \frac{1 + (\omega\tau_1)^{1-\alpha_1} \sin(\pi\alpha_1 / 2)}{1 + 2(\omega\tau_1)^{1-\alpha_1} \sin(\pi\alpha_1 / 2) + (\omega\tau_1)^{2-2\alpha_1}} \\ + (\chi_{T2} - \chi_{T1}) \frac{1 + (\omega\tau_2)^{1-\alpha_2} \sin(\pi\alpha_2 / 2)}{1 + 2(\omega\tau_2)^{1-\alpha_2} \sin(\pi\alpha_2 / 2) + (\omega\tau_2)^{2-2\alpha_2}}$$

and the out-of-phase component

$$\chi''(\omega) = (\chi_{T1} - \chi_S) \frac{(\omega\tau_1)^{1-\alpha_1} \cos(\pi\alpha_1 / 2)}{1 + 2(\omega\tau_1)^{1-\alpha_1} \sin(\pi\alpha_1 / 2) + (\omega\tau_1)^{2-2\alpha_1}} \\ + (\chi_{T2} - \chi_{T1}) \frac{(\omega\tau_2)^{1-\alpha_2} \cos(\pi\alpha_2 / 2)}{1 + 2(\omega\tau_2)^{1-\alpha_2} \sin(\pi\alpha_2 / 2) + (\omega\tau_2)^{2-2\alpha_2}}$$

with the constraint for the isothermal and adiabatic susceptibilities  $\chi_S < \chi_{T1} < \chi_{T2}$  in order to get positive contributions from each primitive component.
