# Supplementary figures and images for: A dinuclear dysprosium Schiff base complex showing slow magnetic relaxation in the absence of an external magnetic field
Source: Royal Society of Chemistry journal article supplement (doi:10.1039/d2nj02591d), 2022-01-01

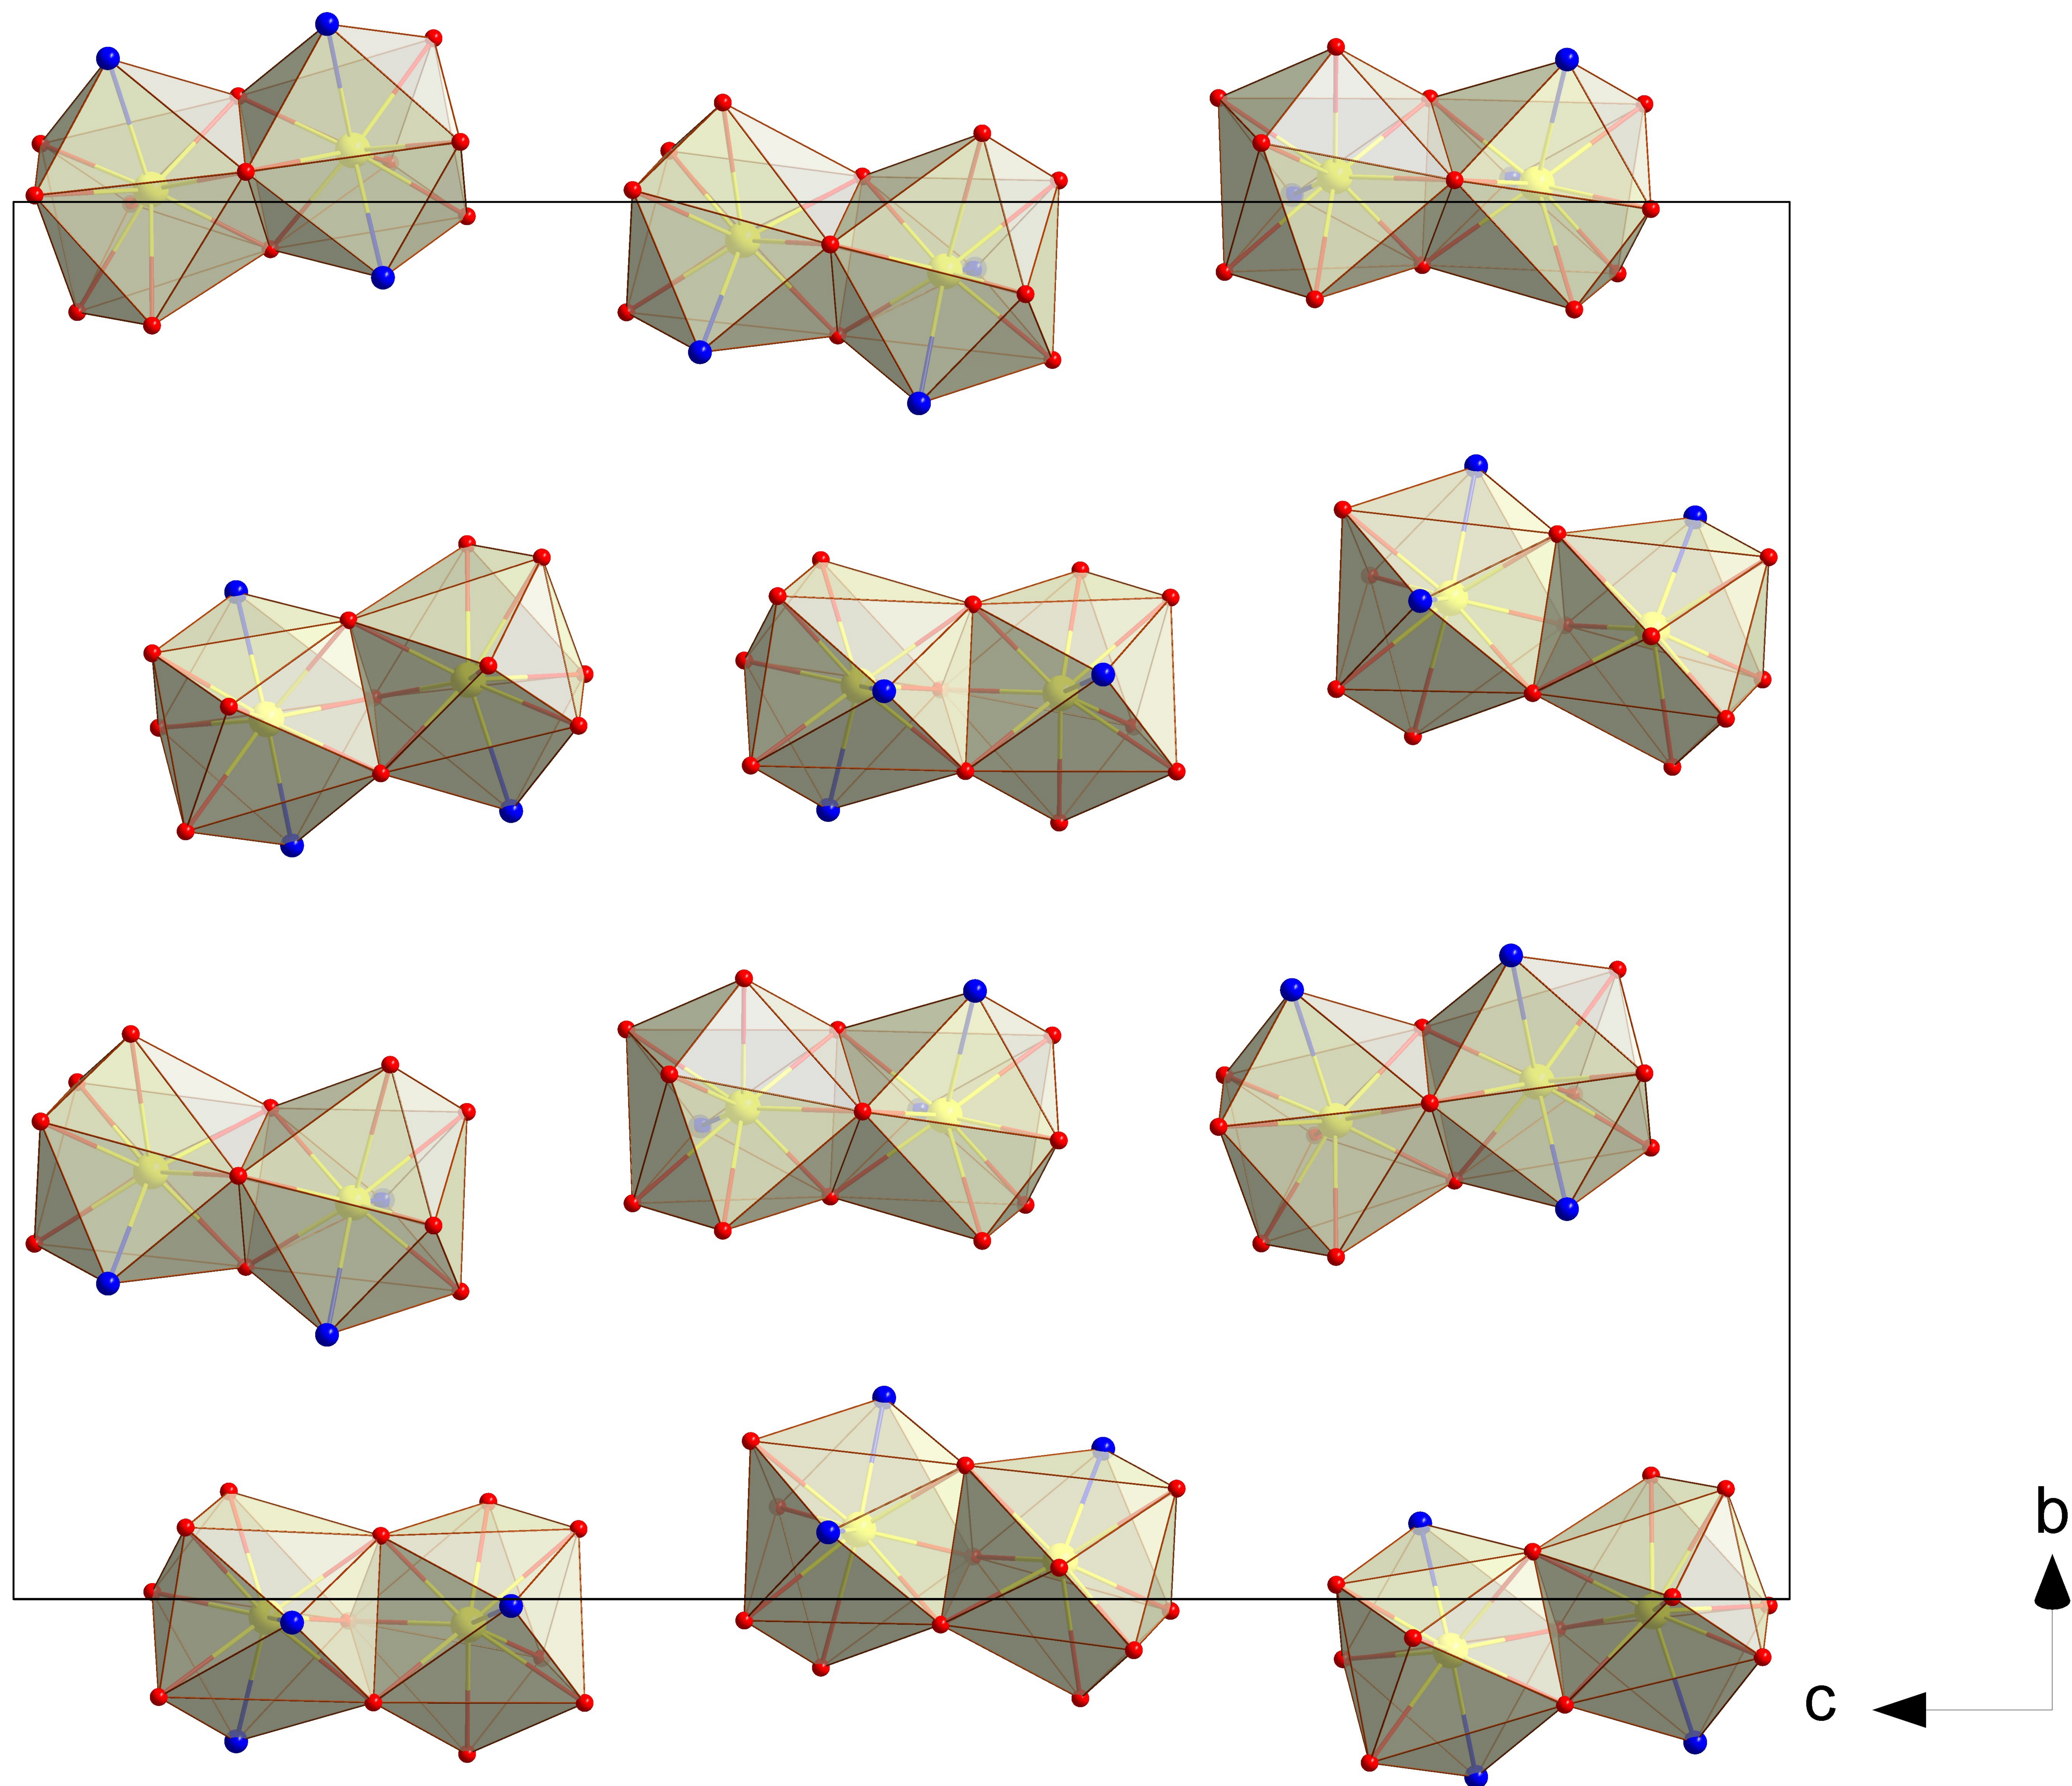

Supplement: d2nj02591d3.pdf [file d2nj02591d3.pdf]
